# Supplementary material for: Uranium-Doped Zinc, Copper, and Nickel Oxides for Enhanced Catalytic Conversion of Furfural to Furfuryl Alcohol: A Relativistic DFT Study
Source: MDPI journal article supplement (doi:10.3390/molecules27186094), 2022-09-18
Supplement: s1 [file s1]

# Uranium-Doped Zinc, Copper, and Nickel Oxides for Enhanced Catalytic Conversion of Furfural to Furfuryl Alcohol: A Relativistic DFT Study

Shuang Li <sup>1,†</sup>, Yu-Chang Hou <sup>1,†</sup>, Yuan-Ru Guo <sup>2,\*</sup> and Qing-Jiang Pan <sup>1,\*</sup>

<sup>1</sup> Key Laboratory of Functional Inorganic Material Chemistry (Ministry of Education), School of Chemistry and Materials Science, Heilongjiang University, Harbin 150080, China

<sup>2</sup> Engineering Research Center of Advanced Wooden Materials, Ministry of Education, College of Material Science and Engineering, Northeast Forestry University, Harbin 150040, China

\* Correspondence: authors: guoyrnefu@163.com (Y.-R.G.); panqjtc@163.com (Q.-J.P.)

† These authors contributed equally to this work.

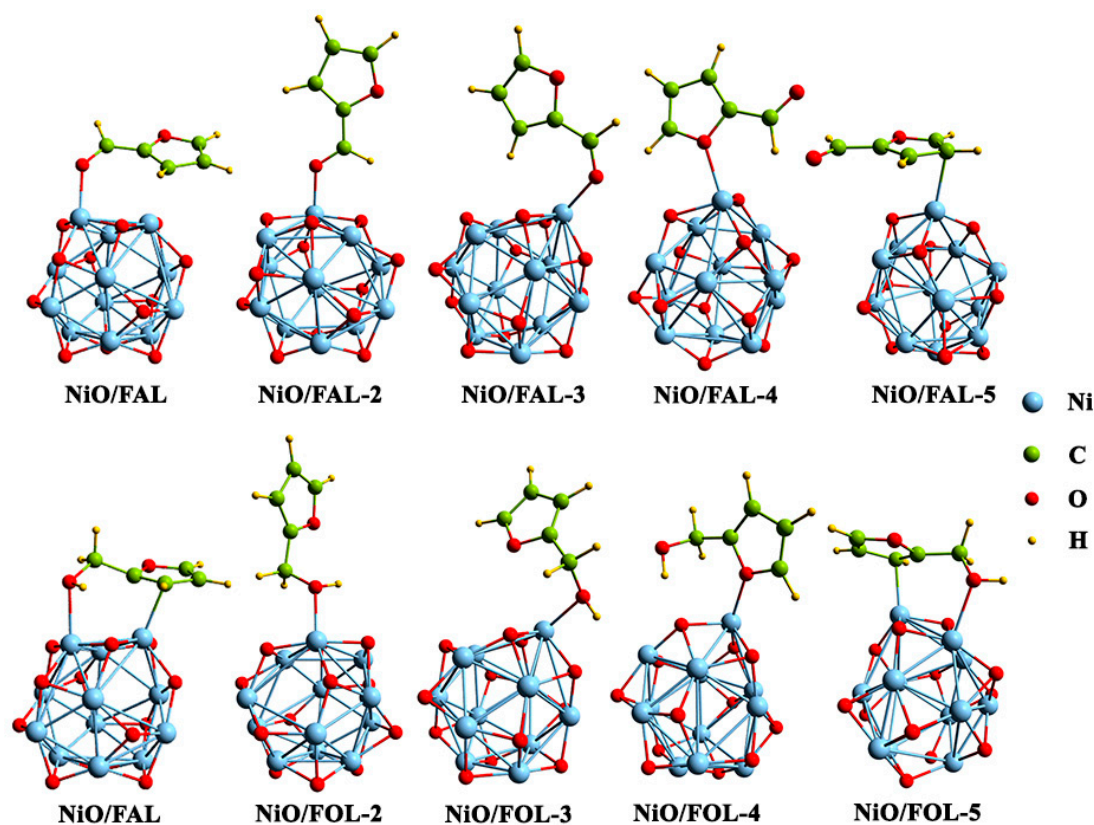

Figure S1. Optimized structures of various isomers NiO/FAL and NiO/FOL.

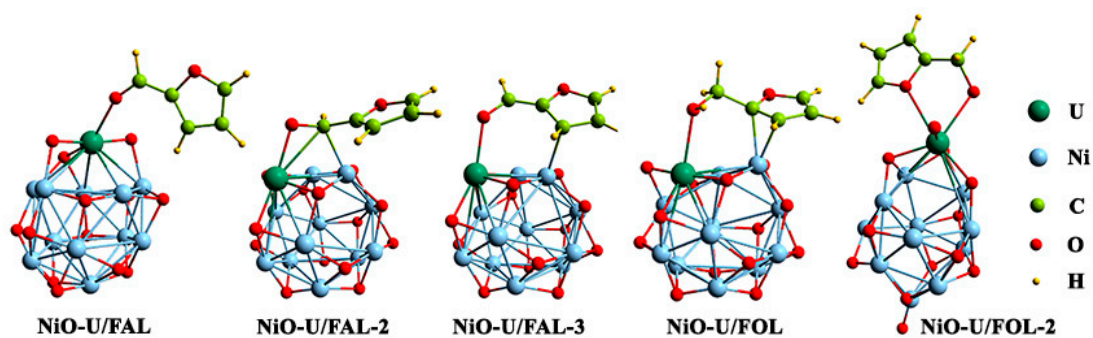

Figure S2. Optimized structures of various isomers NiO-U/FAL and NiO-U/FOL.

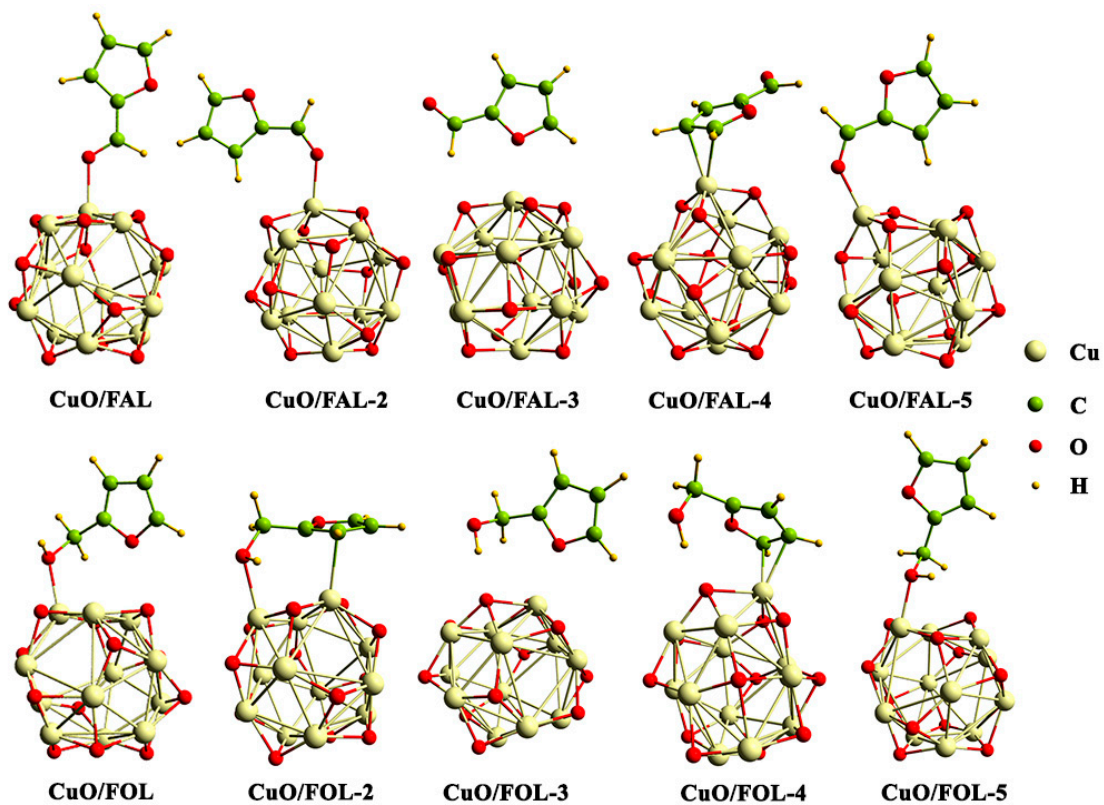

Figure S3. Optimized structures of various isomers CuO/FAL and CuO/FOL.

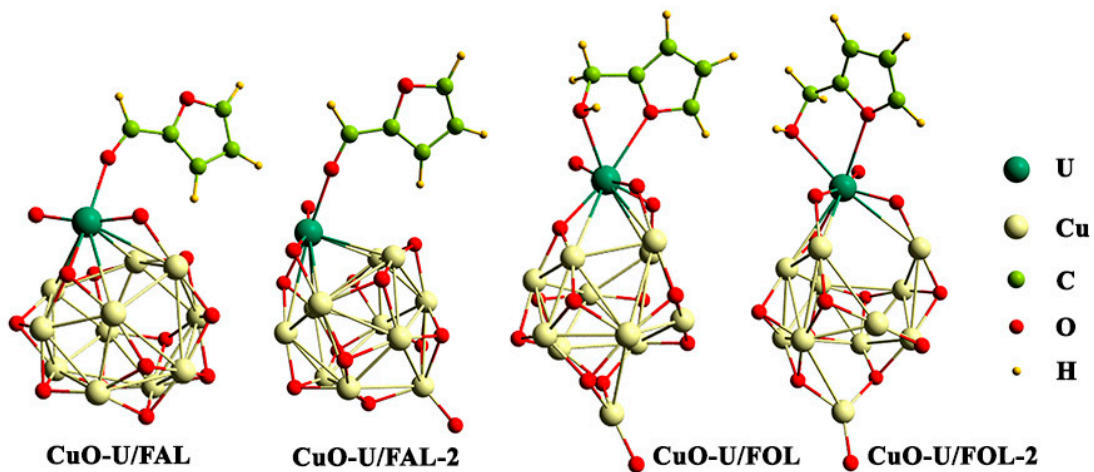

Figure S4. Optimized structures of various isomers CuO-U/FAL and CuO-U/FOL.

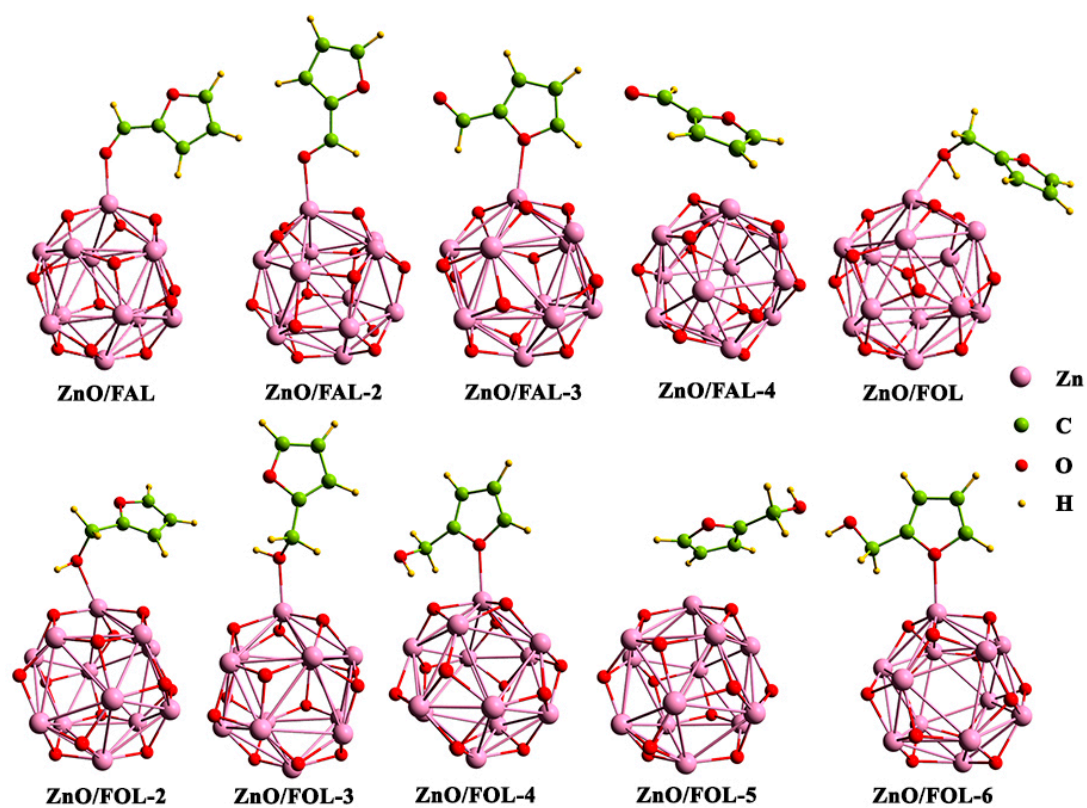

Figure S5. Optimized structures of various isomers ZnO/FAL and ZnO/FOL.

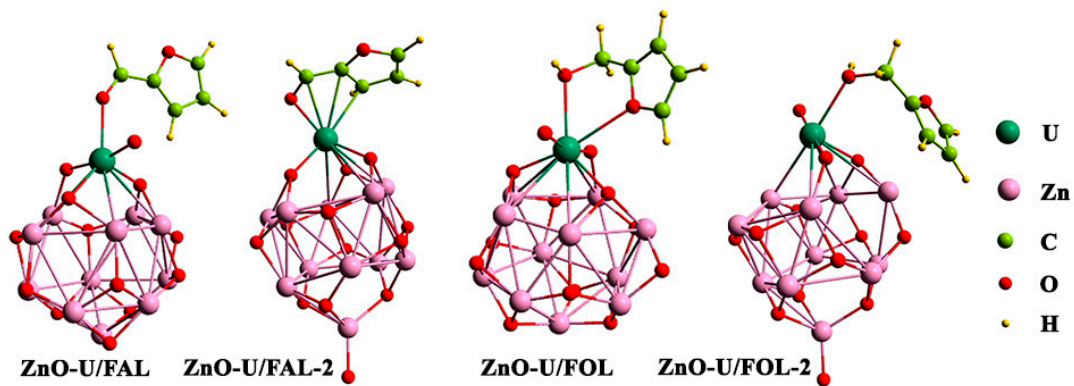

Figure S6. Optimized structures of various isomers ZnO-U/FAL and ZnO-U/FOL.



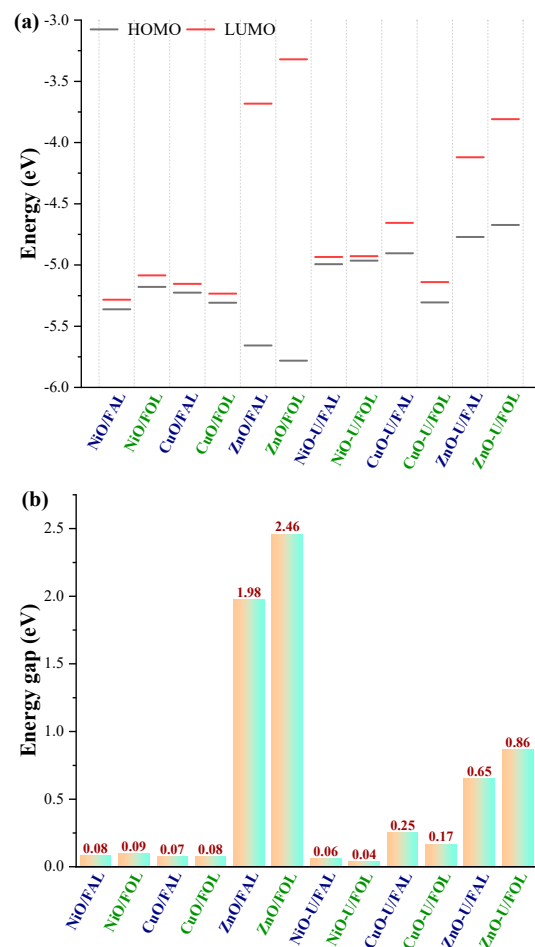

Figure S7. HOMO and LUMO energy levels of Cat/FAL and Cat/FOL (a) and their energy gap values (b).

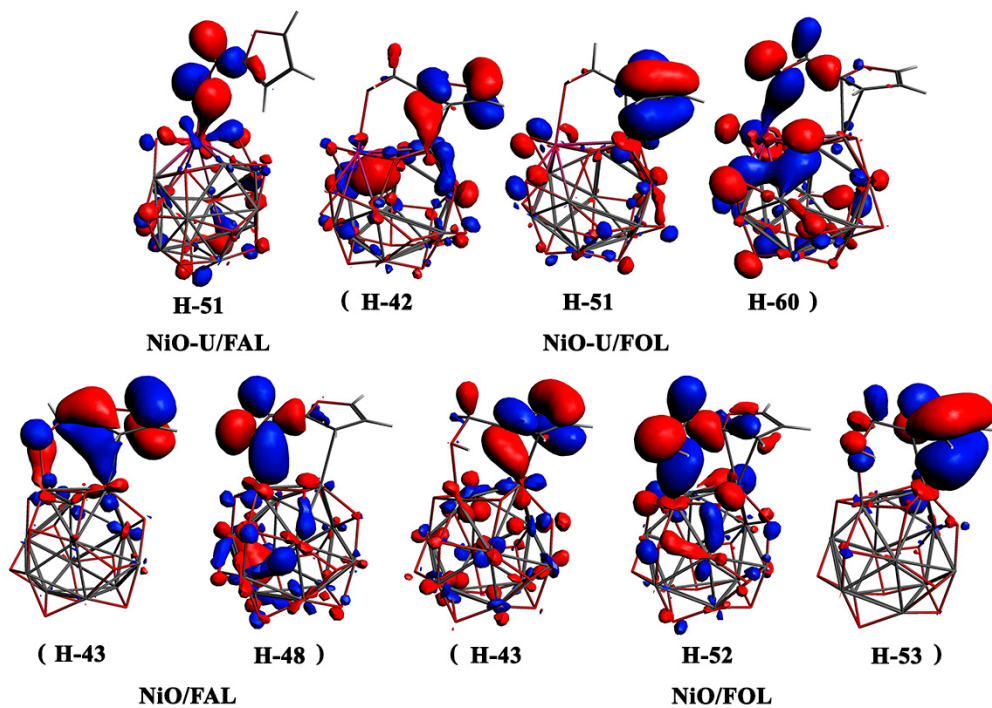

Figure S8. Some orbital diagrams of NiO/FAL, NiO/FOL, NiO-U/FAL and NiO-U/FOL.

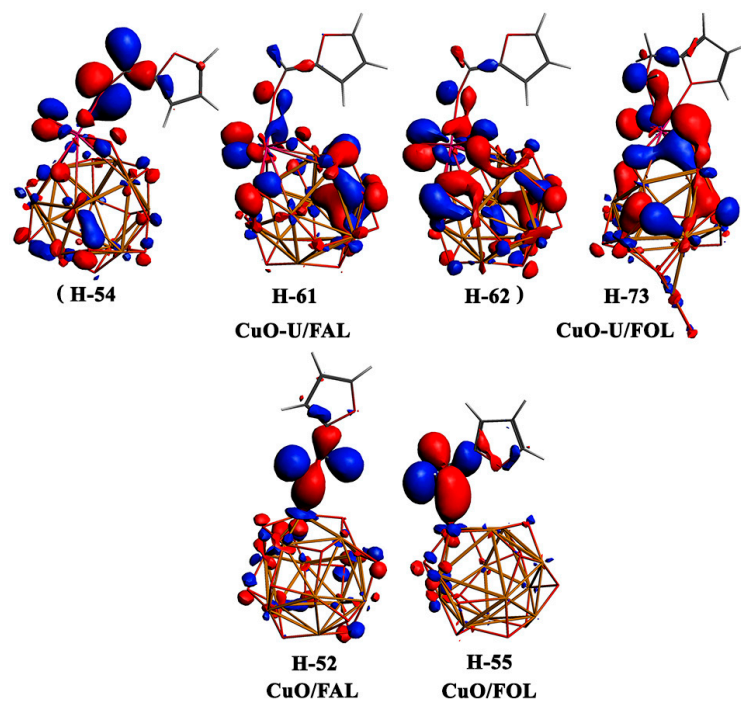

Figure S9. Some orbital diagrams of CuO/FAL, CuO/FOL, CuO-U/FAL and CuO-U/FOL.

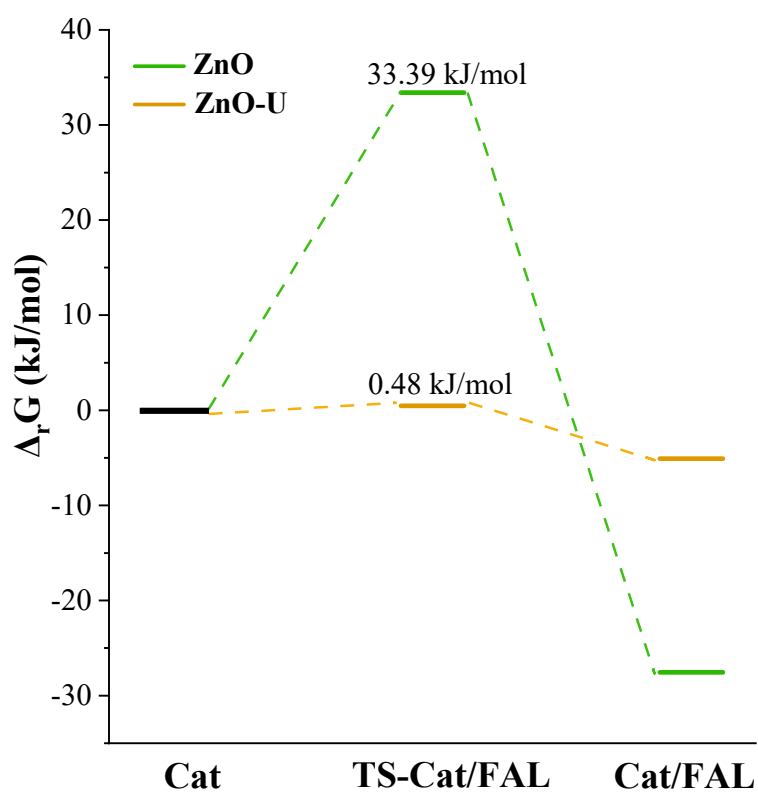

Figure 10. The free energies of zinc-based catalysts adsorbing furfural along the reaction pathway.

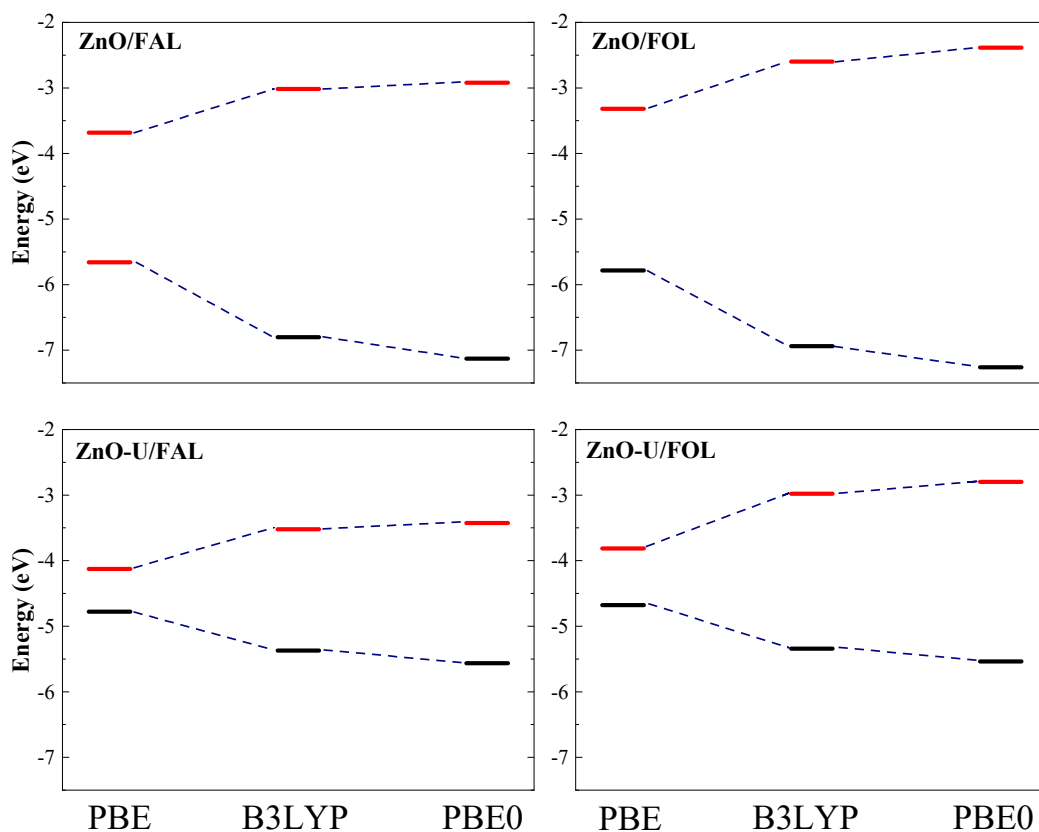

**Figure S11.** HOMO and LUMO orbitals of ZnO/FAL, ZnO/FOL, ZnO-U/FAL and ZnO-U/FOL calculated by various functionals (PBE, B3LYP and PBE0).

**Table S1.** Relative energies (kJ/mol) of various isomers Cat/FAL and Cat/FOL (Cat = NiO, CuO and ZnO) compared to the energy-lowest one.

| Structures | $\Delta E$ | $\Delta E_0$ | $\Delta H$ | $\Delta G$ |
|------------|------------|--------------|------------|------------|
| NiO/FAL    | 0.00       | 0.00         | 0.00       | 0.00       |
| NiO/FAL-2  | 19.50      | 20.21        | 21.36      | 14.40      |
| NiO/FAL-3  | 43.28      | 42.55        | 44.59      | 34.61      |
| NiO/FAL-4  | 92.90      | 88.85        | 91.98      | 79.13      |
| NiO/FAL-5  | 96.75      | 91.41        | 94.74      | 81.58      |
| NiO/FOL    | 0.00       | 0.00         | 0.00       | 0.00       |
| NiO/FOL-2  | 38.70      | 36.69        | 36.77      | 31.46      |
| NiO/FOL-3  | 55.31      | 53.10        | 55.59      | 40.78      |
| NiO/FOL-4  | 80.68      | 77.54        | 80.16      | 69.39      |
| NiO/FOL-5  | 66.39      | 61.68        | 64.28      | 58.07      |
| CuO/FAL    | 0.00       | 0.00         | 0.00       | 0.00       |
| CuO/FAL-2  | 3.99       | 3.69         | 3.68       | 4.12       |
| CuO/FAL-3  | 41.34      | 38.22        | 40.16      | 33.38      |
| CuO/FAL-4  | 42.89      | 39.79        | 40.96      | 36.98      |
| CuO/FAL-5  | 57.14      | 52.80        | 54.01      | 52.76      |
| CuO/FOL    | 0.00       | 0.00         | 0.00       | 0.00       |
| CuO/FOL-2  | 3.68       | 3.84         | 3.22       | 8.35       |
| CuO/FOL-3  | 36.75      | 34.67        | 35.51      | 30.71      |
| CuO/FOL-4  | 27.65      | 25.08        | 25.31      | 26.49      |
| CuO/FOL-5  | 32.29      | 31.74        | 32.38      | 28.58      |
| ZnO/FAL    | 0.00       | 0.00         | 0.00       | 0.00       |
| ZnO/FAL-2  | 4.72       | 4.69         | 5.06       | 2.81       |

|           |       |       |       |       |
|-----------|-------|-------|-------|-------|
| ZnO/FAL-3 | 44.93 | 42.18 | 43.59 | 37.26 |
| ZnO/FAL-4 | 47.12 | 44.59 | 45.93 | 40.74 |
| ZnO/FOL   | 0.00  | 0.00  | 0.00  | 0.00  |
| ZnO/FOL-2 | 13.80 | 14.05 | 14.78 | 7.53  |
| ZnO/FOL-3 | 15.43 | 15.13 | 16.98 | 0.93  |
| ZnO/FOL-4 | 22.15 | 22.25 | 23.02 | 16.56 |
| ZnO/FOL-5 | 47.98 | 46.52 | 48.79 | 37.33 |
| ZnO/FOL-6 | 56.73 | 53.28 | 56.67 | 39.53 |

**Table S2.** Relative energies (kJ/mol) of various isomers Cat/FAL and Cat/FOL (Cat = NiO-U, CuO-U and ZnO-U) compared to the energy-lowest one.

| Structures  | $\Delta E$ | $\Delta E_0$ | $\Delta H$ | $\Delta G$ |
|-------------|------------|--------------|------------|------------|
| NiO-U/FAL   | 0.00       | 0.00         | 0.00       | 0.00       |
| NiO-U/FAL-2 | 21.57      | 22.20        | 18.93      | 34.42      |
| NiO-U/FAL-3 | 53.24      | 52.43        | 50.42      | 62.42      |
| NiO-U/FOL   | 0.00       | 0.00         | 0.00       | 0.00       |
| NiO-U/FOL-2 | 66.87      | 62.53        | 68.78      | 41.99      |
| CuO-U/FAL   | 0.00       | 0.00         | 0.00       | 0.00       |
| CuO-U/FAL-2 | 207.54     | 201.17       | 205.80     | 190.56     |
| CuO-U/FOL   | 0.00       | 0.00         | 0.00       | 0.00       |
| CuO-U/FOL-2 | 14.67      | 14.96        | 14.86      | 15.53      |
| ZnO-U/FAL   | 0.00       | 0.00         | 0.00       | 0.00       |
| ZnO-U/FAL-2 | 434.97     | 426.82       | 427.67     | 425.37     |
| ZnO-U/FOL   | 0.00       | 0.00         | 0.00       | 0.00       |
| ZnO-U/FOL-2 | 533.54     | 527.75       | 532.04     | 515.60     |

**Table S3.** The calculated reaction energies (kJ/mol) for adsorption, hydrogenation and desorption triggered by catalysts.

|                        | Reactions                              | $\Delta_r E$ | $\Delta_r E_0$ | $\Delta_r H$ | $\Delta_r G$ |
|------------------------|----------------------------------------|--------------|----------------|--------------|--------------|
| Step I : Adsorption    | NiO + FAL = NiO/FAL                    | -92.68       | -89.93         | -89.31       | -33.93       |
| Step II: Hydrogenation | NiO/FAL + H <sub>2</sub> = NiO/FOL     | -87.04       | -25.24         | -59.05       | -18.56       |
| Step III: Desorption   | NiO/FOL = NiO + FOL                    | 108.81       | 104.85         | 105.29       | 45.00        |
| Step I : Adsorption    | CuO + FAL = CuO/FAL                    | -74.28       | -70.33         | -68.09       | -24.13       |
| Step II: Hydrogenation | CuO/FAL + H <sub>2</sub> = CuO/FOL     | -79.06       | -19.31         | -52.48       | -13.06       |
| Step III: Desorption   | CuO/FOL = CuO + FOL                    | 82.44        | 79.32          | 77.51        | 29.70        |
| Step I : Adsorption    | ZnO + FAL = ZnO/FAL                    | -78.64       | -74.87         | -72.76       | -27.53       |
| Step II: Hydrogenation | ZnO/FAL + H <sub>2</sub> = ZnO/FOL     | -83.09       | -23.56         | -57.54       | -13.50       |
| Step III: Desorption   | ZnO/FOL = ZnO + FOL                    | 90.82        | 88.12          | 87.24        | 33.53        |
| Step I : Adsorption    | NiO-U + FAL = NiO-U/FAL                | -130.83      | -127.10        | -125.18      | -79.00       |
| Step II: Hydrogenation | NiO-U/FAL + H <sub>2</sub> = NiO-U/FOL | -21.36       | 37.65          | 3.31         | 52.09        |
| Step III: Desorption   | NiO-U/FOL = NiO-U + FOL                | 81.29        | 79.13          | 78.81        | 19.41        |
| Step I : Adsorption    | CuO-U + FAL = CuO-U/FAL                | -135.80      | -131.42        | -129.99      | -80.61       |
| Step II: Hydrogenation | CuO-U/FAL + H <sub>2</sub> = CuO-U/FOL | -37.30       | 19.05          | -9.78        | 8.65         |
| Step III: Desorption   | CuO-U/FOL = CuO-U + FOL                | 102.19       | 102.05         | 96.71        | 64.47        |
| Step I : Adsorption    | ZnO-U + FAL = ZnO-U/FAL                | -55.46       | -52.71         | -49.97       | -5.08        |
| Step II: Hydrogenation | ZnO-U/FAL + H <sub>2</sub> = ZnO-U/FOL | -78.29       | -17.81         | -51.29       | -10.54       |
| Step III: Desorption   | ZnO-U/FOL = ZnO-U + FOL                | 62.85        | 60.21          | 58.20        | 8.12         |

**Table S4.** The sum of the covalent radius and van der Waals radius (Å) of Ni, Cu, Zn, U, H atoms with O, C atoms [1].

| Covalent radius      |      |      |      |      |      |
|----------------------|------|------|------|------|------|
| Bond atoms           | Ni   | Cu   | Zn   | U    | H    |
| O                    | 1.90 | 1.98 | 1.88 | 2.62 | 0.97 |
| C                    | 2.00 |      |      |      |      |
| Van der Waals radius |      |      |      |      |      |
| Bond atoms           | Ni   | Cu   | Zn   | U    | H    |
| O                    | 3.15 | 2.92 | 2.91 | 3.92 | 2.72 |
| C                    | 3.33 |      |      |      |      |

## Reference

1. Kim, S.; Chen, J.; Cheng, T.; Gindulyte, A.; He, J.; He, S.; Li, Q.; Shoemaker, B. A.; Thiessen, P. A.; Yu, B.; Zaslavsky, L.; Zhang, J.; Bolton, E. E., PubChem in 2021: new data content and improved web interfaces. *Nucleic Acids Research* **2021**, 49, (D1), D1388-D1395.
